# Supplementary material for: Monitoring European anthropogenic NO x emissions from space
Source: Copernicus journal article supplement (doi:10.5194/acp-24-7523-2024), 2024-07-03
Supplement: Supplementary file 1 [file acp-24-7523-2024-supplement.pdf]

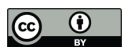

*Supplement of*

## **Monitoring European anthropogenic NO<sub>x</sub> emissions from space**

**Ronald J. van der A et al.**

*Correspondence to:* Ronald J. van der A (avander@knmi.nl) and Jieying Ding (jieying.ding@knmi.nl)

The copyright of individual parts of the supplement might differ from the article licence.

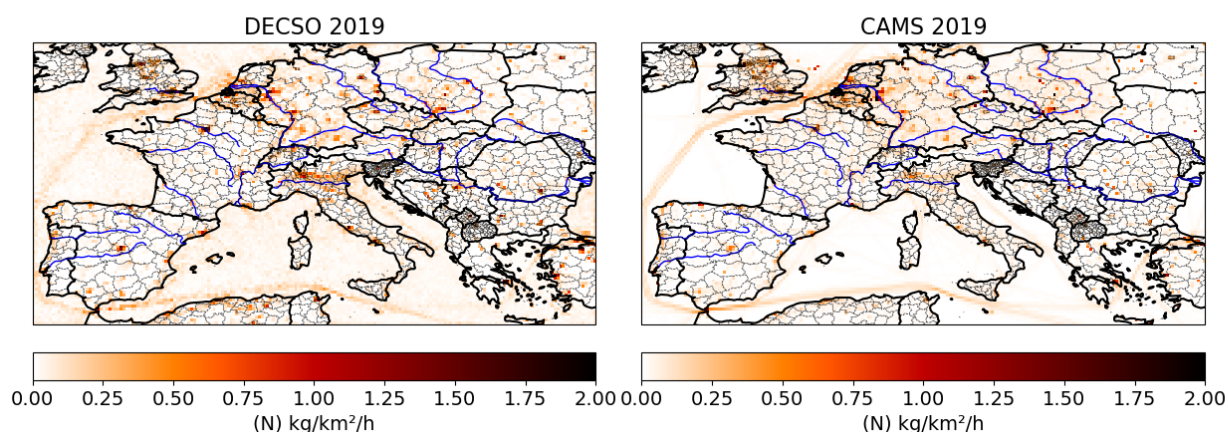

12

13 **Figure S1** European map of annual averaged NO<sub>x</sub> emissions of DECSO and CAM5-REG  
 14 for the year 2019.

15

16

17

**Table S1 PARAMETERS set in DECSO Version 6.1-6.3.**

| Parameter                                                | Value                                             |
|----------------------------------------------------------|---------------------------------------------------|
| Time resolution transport kernel                         | 7.5 minutes or less (depending on the resolution) |
| Maximum lifetime during iterations                       | 100 hours                                         |
| Minimum Lifetime                                         | 0.5 hour                                          |
| Maximum Lifetime                                         | 16 hours                                          |
| Smallest allowed value for matrix H elements             | 0.01                                              |
| Alpha (Regularisation factor for lifetime fit)           | 0.01                                              |
| Emission correlation length                              | 0.5 km                                            |
| Q <sub>abs</sub> Absolute error of emissions             | 0.025 [1e15 molec/cm <sup>2</sup> /h]             |
| Q <sub>rel</sub> Relative error of emissions             | 0.026                                             |
| OmF correlation length (default)                         | 10 km                                             |
| Pa_radius (Max. distance for cov. analysis)              | 50 km                                             |
| absMsigma (absolute error of $\sigma_R$ )                | 0.1                                               |
| relMsigma (relative error of $\sigma_R$ )                | 0.05                                              |
| Tikhonov_threshold                                       | 0.01                                              |
| Error of start-field Pa of emissions on day 1            | 0.3 [1e15 molec/cm <sup>2</sup> /h]               |
| Maximum distance for emission-concentration relationship | 150 km or less (depending on the resolution)      |

19

20 **Table S2. Historical overview of the various DECSO versions and publications**

| Version      | Year of release | Study using this data version                                       |
|--------------|-----------------|---------------------------------------------------------------------|
| 1            | 2012            | Mijling and Van der A (2012)                                        |
| 2            | 2013            | Mijling et al. (2013)                                               |
| 3a           | 2014            | GlobEmission, phase 2 (East Asia, Middle East, South Africa)        |
| 3b           | 2015            | Ding et al. (2015), GlobEmission, phase 2 (East Asia, Middle East)  |
| 4            | 2016            | GlobEmission, phase 2 (East Asia)                                   |
| 5.0          | 2017            | Ding et al. (2017a, 2017b)                                          |
| 5.1          | 2018            | Ding et al. (2018)                                                  |
| 5.2          | 2019            | Van der A et al. (2020)                                             |
| 5.2-superobs | 2020            | Ding et al. (2020)                                                  |
| 5.6          | 2022            | SEEDS, first phase, 0.2x0.2 degree (project documentation)          |
| 6.0          | 2022            | SEEDS, first phase, 0.05x0.05 degree (project documentation)        |
| 6.1          | 2022            | Zhang et al. (2023)                                                 |
| 6.2          | 2023            | SEEDS, second phase, current study                                  |
| 6.3          | 2023            | Same as 6.2 but with improved biogenic emissions (Lin et al., 2023) |

21

22

23
